# Supplementary material for: Antifungal Activity of Biosynthesized Silver Nanoparticles (AgNPs) against Aspergilli Causing Aspergillosis: Ultrastructure Study
Source: MDPI journal article supplement (doi:10.3390/jfb13040242), 2022-11-15
Supplement: s1 [file s1]

Table S1: Characteristics of *B. thuringiensis*.

| Well | Test G+ve endospore                      | abbreviation | Amount/Well (µg) | 6 |
|------|------------------------------------------|--------------|------------------|---|
| 1    | β-xylosidase                             | BXYL         | 0.0324           | - |
| 3    | L-lysine-arylamidase                     | LysA         | 0.0228           | - |
| 4    | L-aspartate arylamidase                  | AspA         | 0.024            | + |
| 5    | leucine-arylamidase                      | LeuA         | 0.0234           | + |
| 7    | phenylalanine arylamidase                | PheA         | 0.0264           | + |
| 8    | l-proline arylamidase                    | ProA         | 0.0234           | - |
| 9    | β-galactosidase                          | BGAL         | 0.036            | - |
| 10   | L-pyrrolydonyl-arylamidase               | PyrA         | 0.018            | + |
| 11   | α-galactosidase                          | AGAL         | 0.036            | - |
| 12   | alanine arylamidase                      | AlaA         | 0.0222           | + |
| 13   | tyrosine arylamidase                     | TyrA         | 0.0282           | + |
| 14   | β-n-acetyl-glucosaminidase               | BNAG         | 0.0408           | - |
| 15   | ala-phe-pro arylamidase                  | APPA         | 0.0384           | - |
| 18   | cyclodextrin                             | CDEX         | 0.3              | - |
| 19   | d-galactose                              | dGAL         | 0.3              | - |
| 21   | glycogen                                 | GLYG         | 0.1875           | - |
| 22   | myo-inositol                             | INO          | 0.3              | - |
| 24   | methyl-α-d-glucopyranoside acidification | MdG          | 0.3              | - |
| 25   | ellman                                   | ELLM         | 0.03             | - |
| 26   | methyl-d-xyloside                        | MdX          | 0.3              | - |
| 27   | α-mannosidase                            | AMAN         | 0.036            | - |

|    |                         |           |        |   |
|----|-------------------------|-----------|--------|---|
| 29 | maltotriose             | MTE       | 0.3    | + |
| 30 | glycine arylamidase     | GlyA      | 0.01 2 | - |
| 31 | d-mannitol              | dMAN      | 0.3    | - |
| 32 | d-mannose               | dMNE      | 0.3    | - |
| 34 | d-melezitose            | dMLZ      | 0.3    | - |
| 36 | n-acetyl-d-glucosamine  | NAG       | 0.3    | + |
| 37 | palatinose              | PLE       | 0.3    | - |
| 39 | L-rhamnose              | IRHA      | 0.3    | - |
| 41 | $\beta$ -glucosidase    | BGLU      | 0.036  | - |
| 43 | $\beta$ -mannosidase    | BMAN      | 0.036  | - |
| 44 | phosphoryl choline      | PHC       | 0.0366 | - |
| 45 | pyruvate                | PVATE     | 0.15   | + |
| 46 | $\alpha$ -glucosidase   | AGLU      | 0.036  | - |
| 47 | d-tagatose              | dTAG      | 0.3    | - |
| 48 | d-trehalose             | dTRE      | 0.3    | + |
| 50 | inulin                  | INU       | 0.12   | - |
| 53 | d-glucose               | dGLU      | 0.3    | + |
| 54 | d-ribose                | dRIB      | 0.3    | + |
| 56 | putrescine assimilation | PSCNa     | 0.201  | - |
| 58 | growth in 6.5% NaCl     | NaCl 6.5% | 1.95   | + |
| 59 | kanamycin resistance    | KAN       | 0.006  | + |
| 60 | oleandomycin resistance | OLD       | 0.003  | - |
| 61 | esculin hydrolysis      | ESC       | 0.0225 | + |

|                       |                        |         |         |                         |
|-----------------------|------------------------|---------|---------|-------------------------|
| 62                    | tetrazolium red        | TTZ     | 0.0189  | -                       |
| 63                    | polymixinj3 resistance | POLYB_R | 0.00093 | +                       |
| Probability (percent) |                        |         |         | 94% B.<br>thuringiensis |
